# Supplementary material
Source: PubMed Central journal article supplement (PMC10880601)
Supplement: aem.02014-23-s0001.pdf [file aem.02014-23-s0001.pdf]

a)

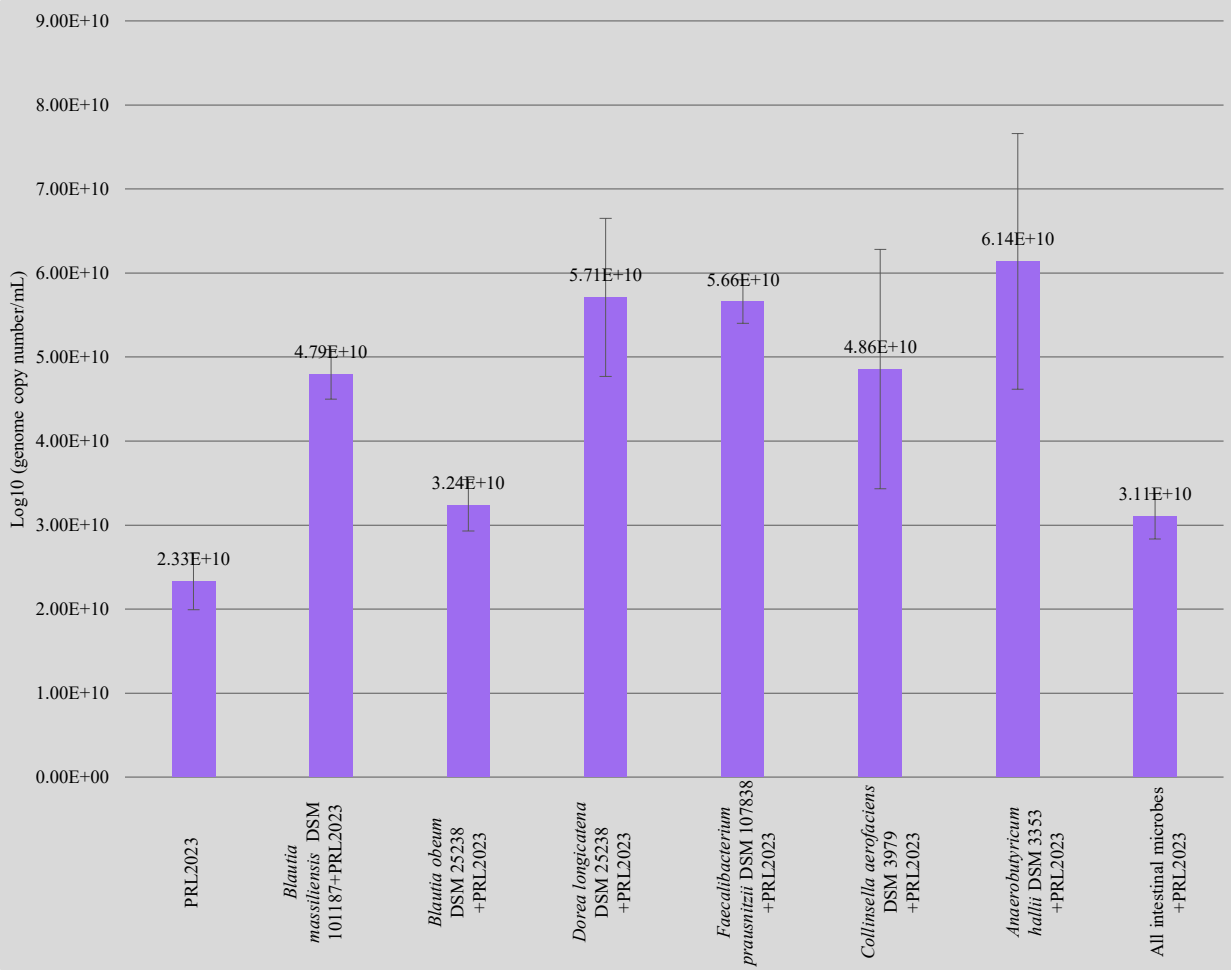

**Figure S1.** Quantitative PCR evaluation of the numerical load of *B. adolescentis* PRL2023 in bi- and multi-association assays. The graph reports the average abundances of the prototype in the different co-cultivation assays.
