# Supplementary material
Source: PubMed Central journal article supplement (PMC10880601)
Supplement: aem.02014-23-s0002.pdf [file aem.02014-23-s0002.pdf]

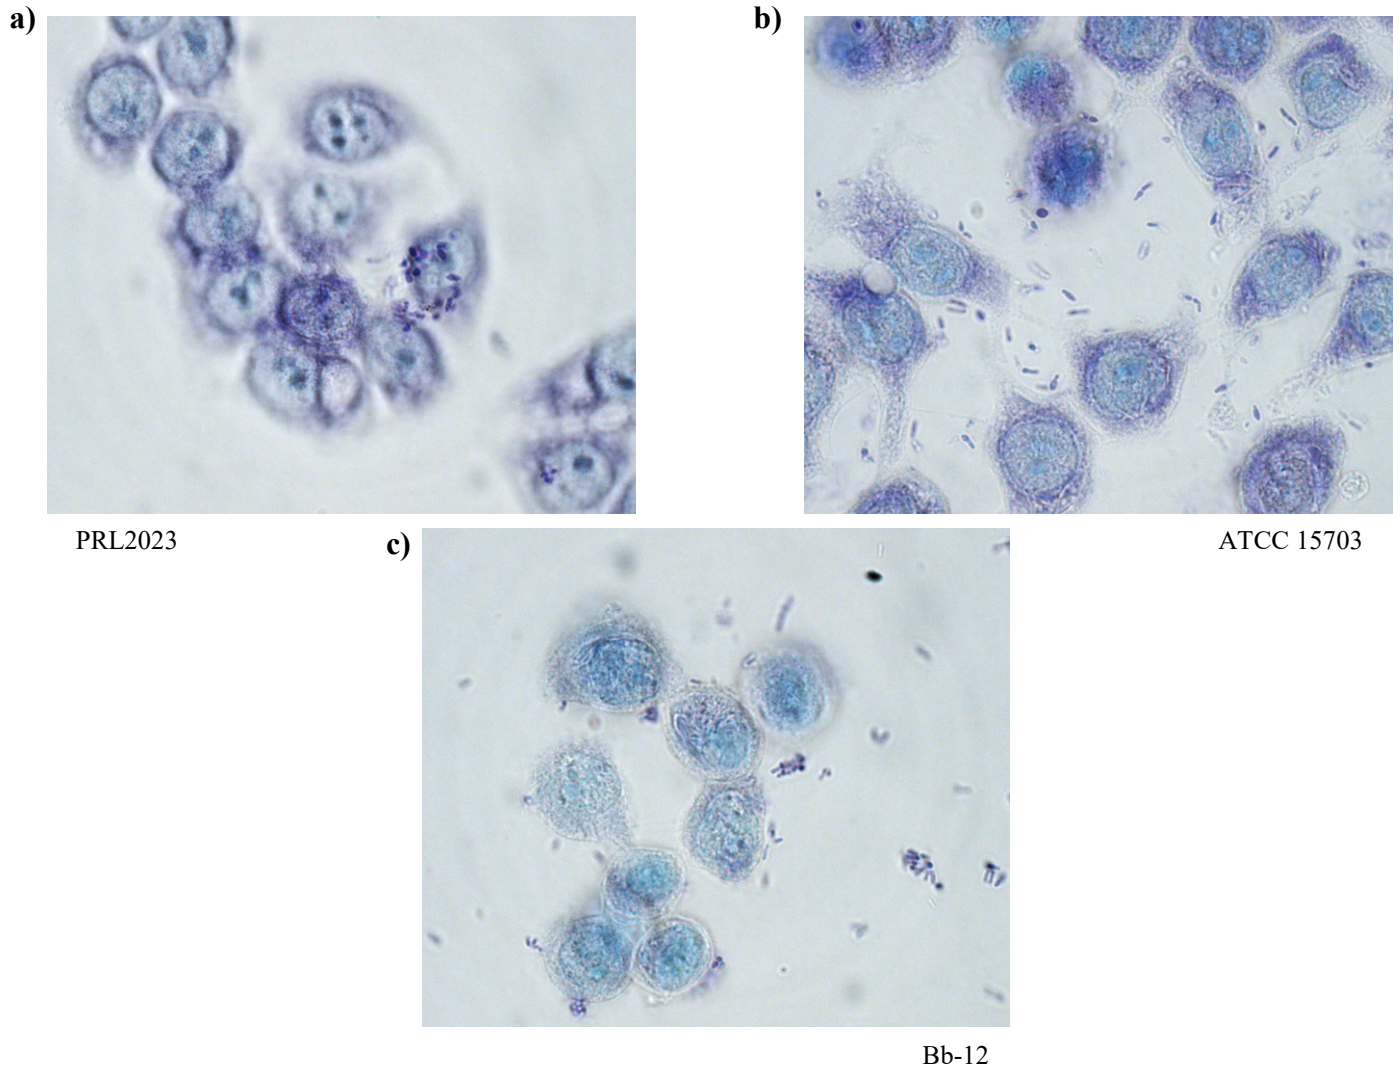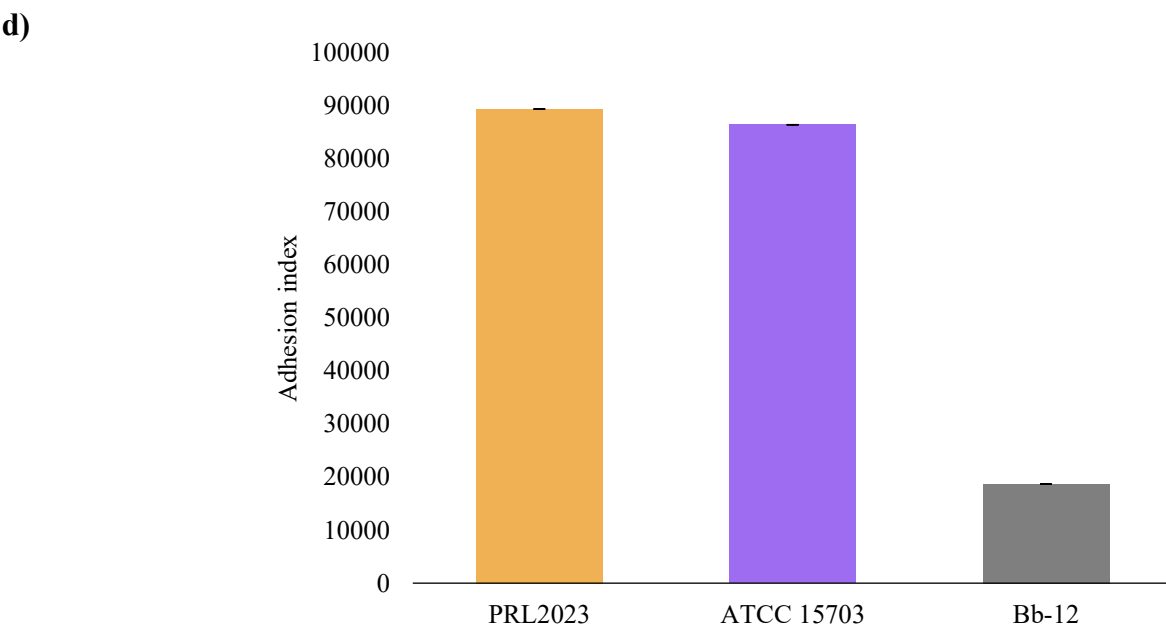

**FigureS2.** Adhesion of *B. adolescentis* PRL2023 and ATCC 15703 and *B. animalis* subsp. *lactis* Bb-12 cells to HT29-X cells monolayers. (a) Light microscopic images of HT29-X monolayer cells as observed with Giemsa staining of *B. adolescentis* PRL2023 cells. (b) Light microscopic images of HT29-X monolayer cells as observed with Giemsa staining of *B. adolescentis* ATCC 15703 cells. (c) Light microscopic images of HT29-X monolayer cells as observed with Giemsa staining of *B. animalis* subsp. *lactis* Bb-12 cells. (d) Quantification of adhesion ability of *B. adolescentis* PRL2023 and ATCC 15703 and *B. animalis* subsp. *lactis* Bb-12 cells. The vertical bars indicate standard deviations.
